# Supplementary material for: High-resolution in situ analysis of Cas9 germline transcript distributions in gene-drive Anopheles mosquitoes
Source: PubMed Central journal article supplement (PMC8728002; doi:10.1093/g3journal/jkab369), 2021-11-15
Supplement: jkab369_supplementary_figures_tables.pdf [file jkab369_supplementary_figures_tables.pdf]

# High-resolution *in situ* analysis of Cas9 germline transcript distributions in gene-drive *Anopheles* mosquitoes

Gerard Terradas<sup>‡1,2a</sup>, Anita Hermann<sup>‡1,2</sup>, Anthony A. James<sup>3,4</sup>, William McGinnis<sup>1,2</sup>, Ethan Bier<sup>1,2\*</sup>

<sup>1</sup> Section of Cell and Developmental Biology, University of California, San Diego, La Jolla, CA, 92093, USA

<sup>2</sup> Tata Institute for Genetics and Society, University of California, San Diego, La Jolla, CA, 92093, USA

<sup>3</sup> Department of Microbiology and Molecular Genetics, University of California, Irvine, CA, 92697, USA

<sup>4</sup> Department of Molecular Biology and Biochemistry, University of California, Irvine, CA, 92697, USA

<sup>‡</sup> These authors contributed equally

\* Corresponding author

e-mail: ebier@ucsd.edu

Current address:

<sup>a</sup> Department of Entomology, Center for Infectious Disease Dynamics and the Huck Institutes of the Life Sciences, The Pennsylvania State University, University Park, PA, 16802, USA

**This document contains: Supplementary Figures and Table**

- Figures S1 – S5
- Tables S1, S2

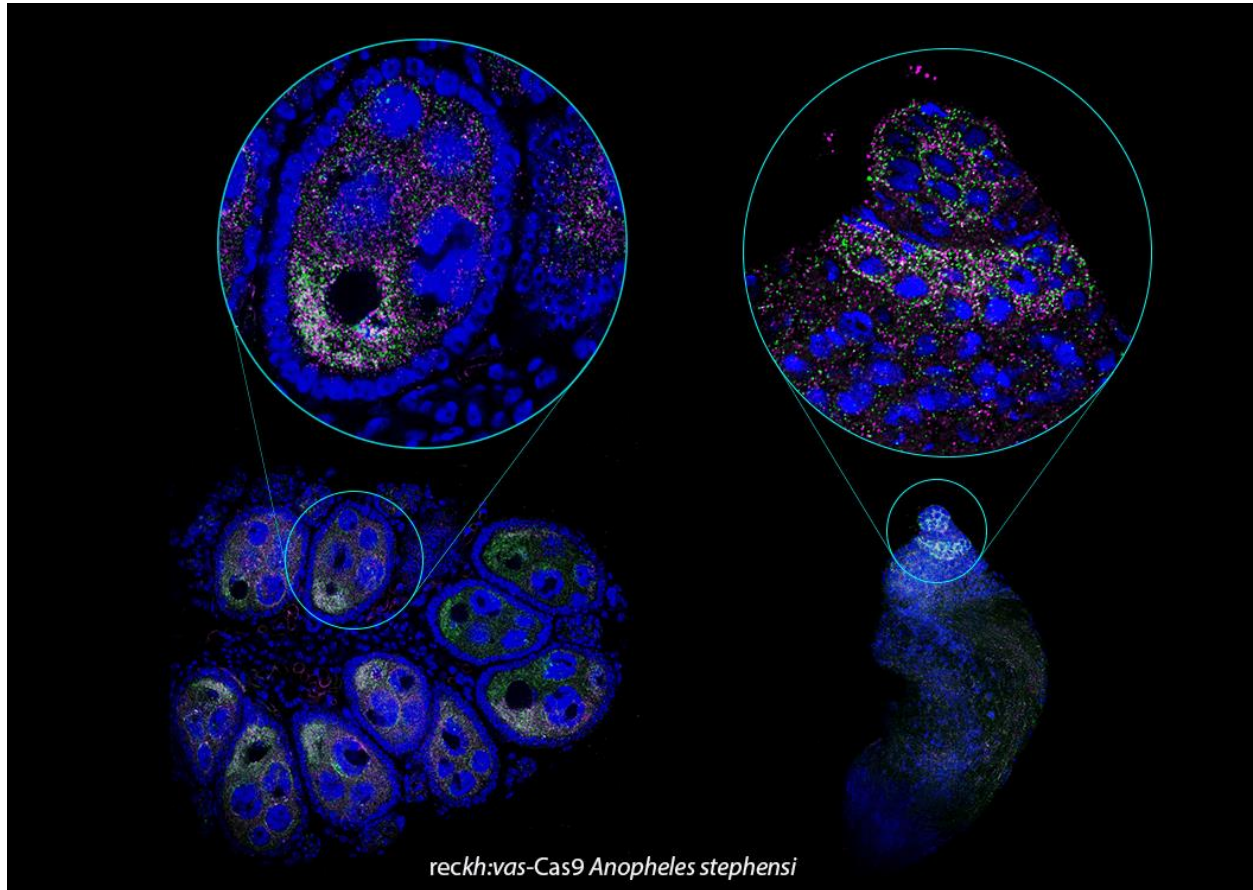

**Figure S1 – High magnification images of ovarian follicle and testes stem cell niche in co-stained *reckh:vas-Cas9 Anopheles stephensi*.** A high concentration of co-localized transcripts (pearl) of the *vasa* endogenous gene (green) and *vasa*-driven Cas9 (magenta) can be observed in detail. Additional cellular compartments can be observed in higher magnification images, particularly follicle and polytene-containing nurse cells (DAPI stain, in blue) or oocyte (non-DAPI) in the female gonads and stem cell nuclei (DAPI) in males.

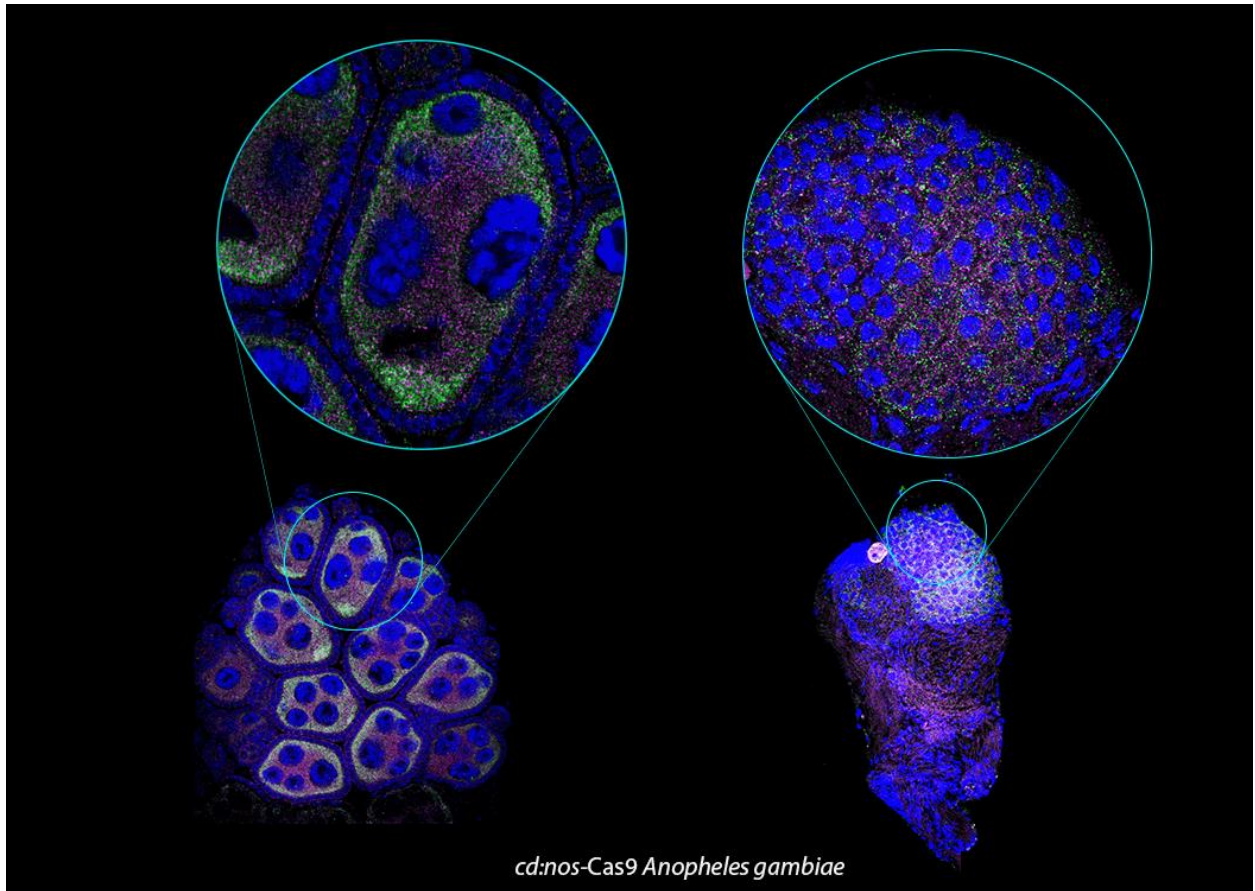

**Figure S2 – High magnification images of ovarian follicle and testes stem cell niche in co-stained *cd:nos-Cas9 Anopheles gambiae*.** Co-localization of single *nos* endogenous gene (green) and *nos*-driven Cas9 (magenta) transcripts can be observed in detail. Additional cellular compartments can be observed in higher magnification images, particularly follicle and polytene-containing nurse cells (DAPI stain, in blue) or oocyte (non-DAPI) in the female gonads and stem cell nuclei (DAPI) in males.

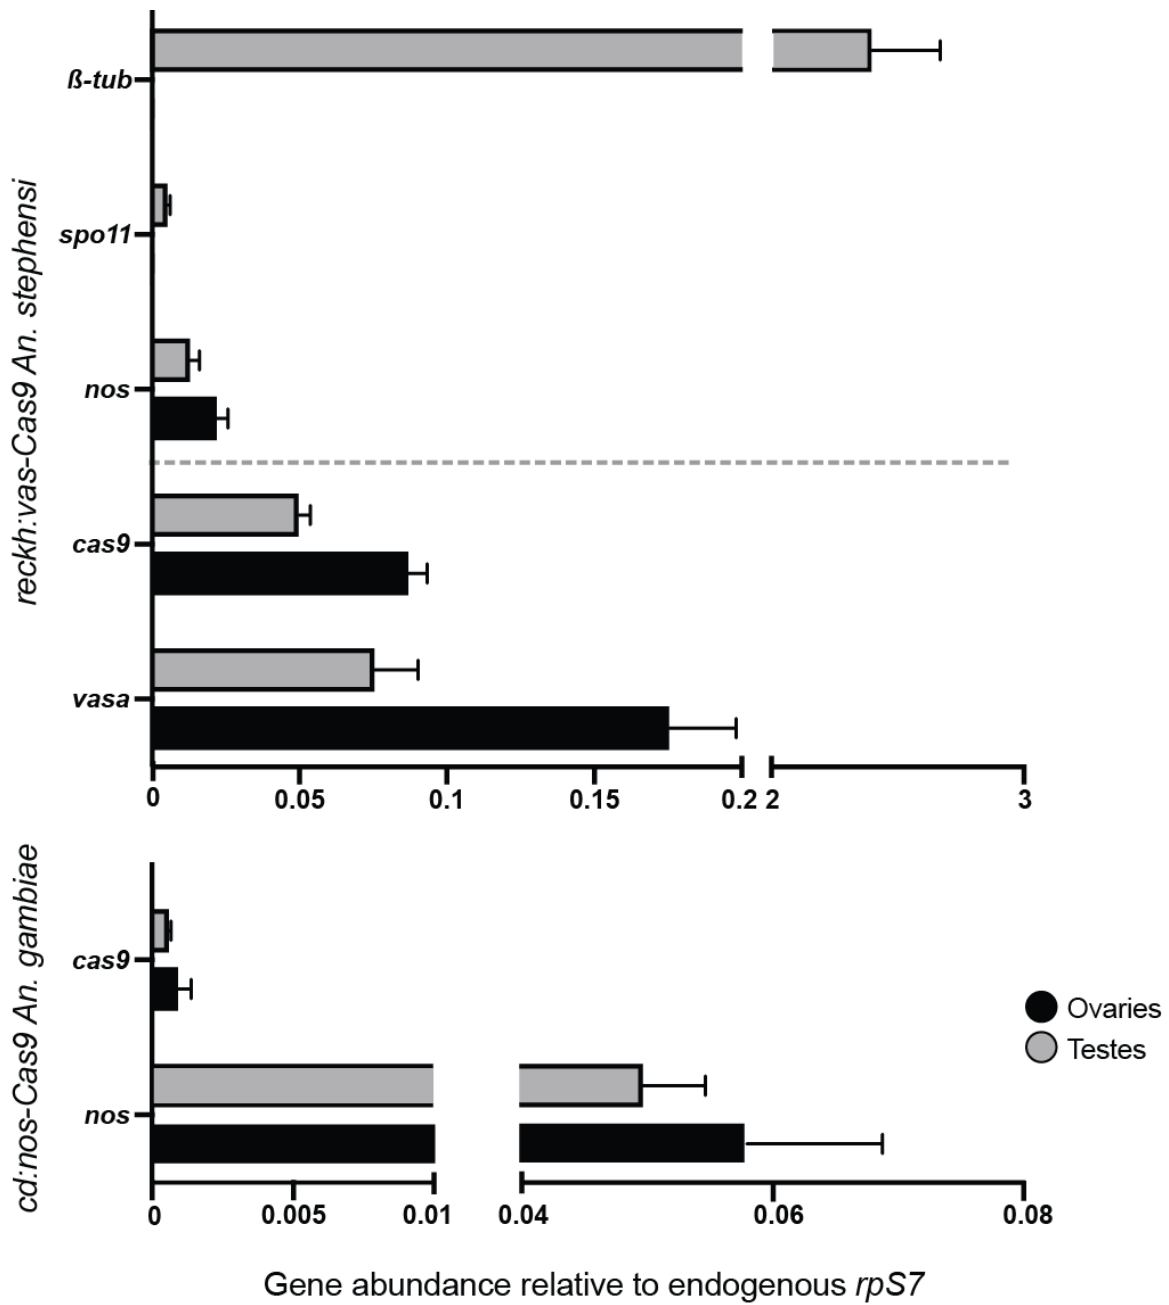

**Figure S3 – Quantitative reverse transcription PCR (RT-qPCR) for the candidate genes in transgenic *An. stephensi* and *An. gambiae*.** Each replicate contains approximately 40 mosquito ovaries or testes pooled to extract their RNA, which was reverse transcribed prior to performing the qPCR using gene specific primers. The mRNA abundance of each gene was normalized to species-specific *rpS7* and plotted. Mean values are depicted in grey (male gonads, n=6) or black (female gonads, n=8) bars. Error bars show SD.

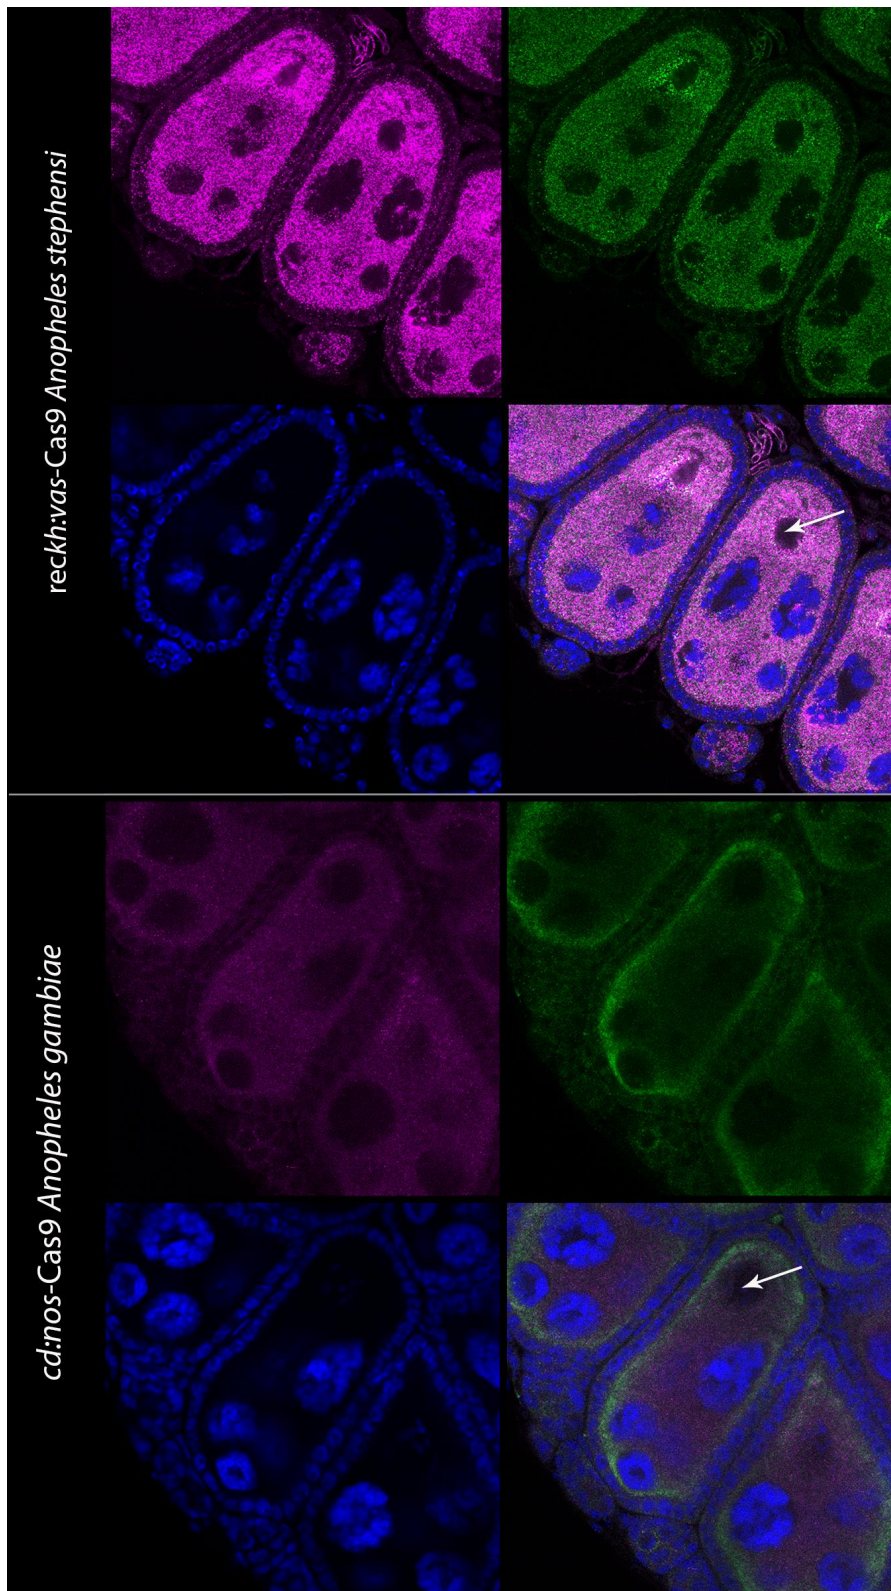

**Figure S4 – Comparison between detection of transcripts in *An. stephensi* and *An. gambiae* ovarian follicles using the same exact microscopy settings.** In order to confirm differences in expression obtained by qPCR, we used the exact same microscopy settings (gain, offset) to observe *in situ* stains of Cas9 from both species. Figure depicts localization of Cas9 (magenta), vasa/nos (green) and nuclei (blue) in pre-bloodmeal samples. White arrows point to the oocyte in the ovarian follicle.

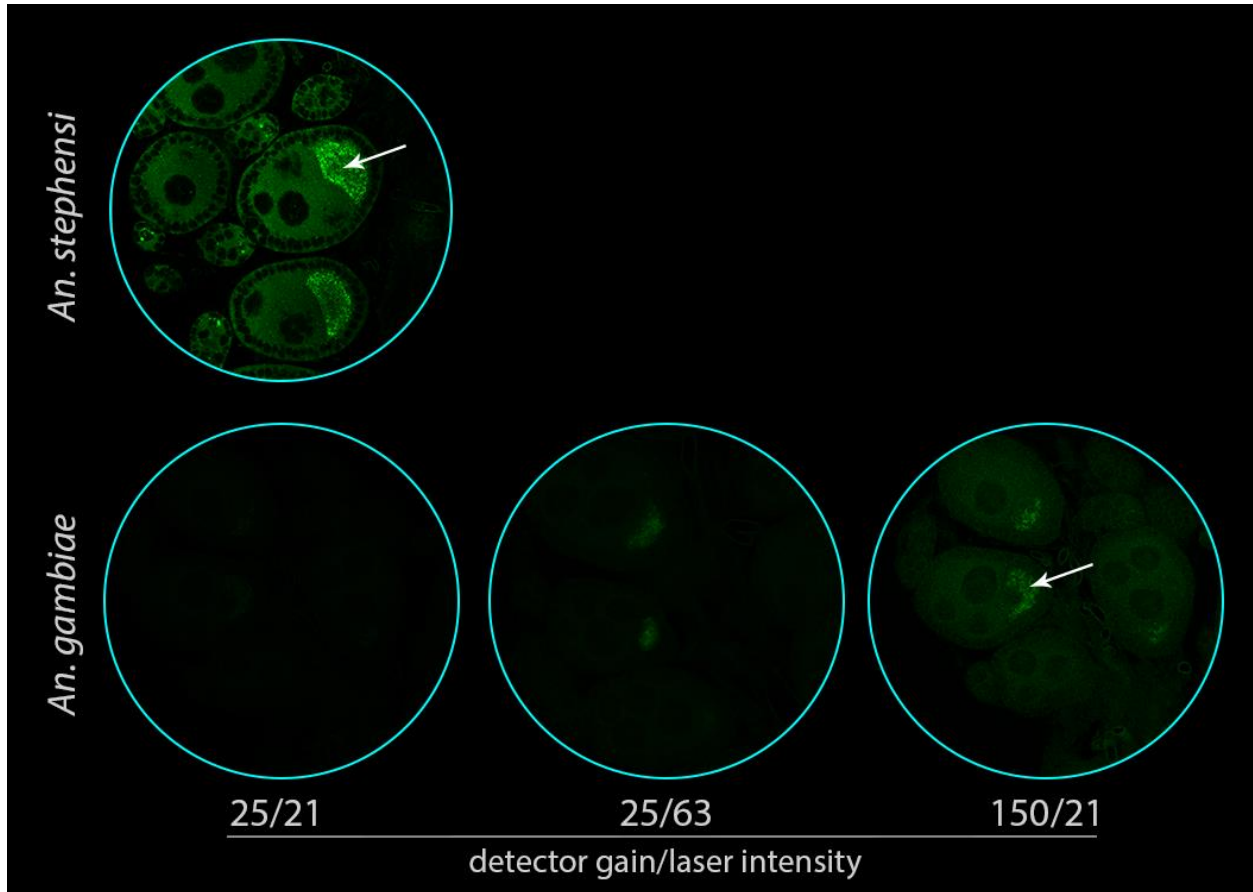

Figure S5 – Comparison between detection of transcripts in *An. stephensi* and *An. gambiae* with differing microscopy settings using probes targeting the *oskar* gene. White arrows point to the oocyte in the ovarian follicle.

**Table S1 – Primers (5' to 3') used for different experimental assays in the paper.**

|              | <b>GENE ID</b> | <b>COMMON NAME</b>      | <b>SEQUENCE</b>                                                | <b>AMPLICON SIZE</b>                          |       |
|--------------|----------------|-------------------------|----------------------------------------------------------------|-----------------------------------------------|-------|
| <b>PROBE</b> | ASTE003208     | Aste-B <sub>2</sub> tub | ATGCGTGAAATCGTTCACCTACAA<br>TCAGTCTTCCCCGCCTTCC                | 1.5Kb                                         |       |
|              | ASTE000088     | Aste-spo11              | GATGGCTTCAACCAAGTGCAG<br>TTAACCCAAGAACGGATGTTCTTC              | 2.2Kb                                         |       |
|              | ASTE008611     | Aste-snail              | ATGCCAACATCGATCATGCAGAAG<br>CTAGTACACGGCGATGTTACCACC           | 1.8Kb                                         |       |
|              | ASTE003241     | Aste-vasa               | TGTGACGAGGGACGAAGCTTC<br>TTAGTCCCACGCTTCTCCGG                  | 1.8Kb                                         |       |
|              | ASTE002241     | Aste-oskar              | ATGGTTTTACTCGCACCAACCA<br>GTAATATCTCCACTGTTCTCGG               | 1.5Kb                                         |       |
|              | ASTE011088     | Aste-zpg                | CTAGCGGTTCCAAGCAGAAC<br>CTGTGCATTATCCGCACAAC                   | 1Kb                                           |       |
|              | AGAP006098     | Agam-nos                | ATGGAGGTGACGAAACAGAACG<br>CTACAAACGGACTAGCCGCTTC               | 1Kb                                           |       |
|              | AGAP003545     | Agam-oskar              | ATGGGTTTTACTCGCACCAACC<br>GTAGTACCGCCACTCTTCGC                 | 2Kb                                           |       |
|              |                | Cas9                    | CTGCTACCTGCAGGAGATCTTCTCG<br>TTCATGATGTTTCGAGTAGAAGAAGTACTTGGC | 3Kb                                           |       |
|              | <b>RT-QPCR</b> | AGAP010592              | Agam-rpS7                                                      | CCATCCTGGAGGATCTGGTA<br>GATGGTGGTCTGCTGGTTCT  | 116bp |
|              |                | ASTE004816              | Aste-rpS7                                                      | TCCTGGAGGATCTGGTGTTCT<br>GATGGTGGTCTGCTGGTTCT | 112bp |
|              |                | ASTE003208              | Aste-B <sub>2</sub> tub                                        | TGGATCGGACTGTTTCCTTC<br>TGAATGTGTCCCTCCGTGTA  | 122bp |
|              |                | ASTE000088              | Aste-spo11                                                     | CCGCGGTTACACTTCTTCAT<br>TCGAACATTTGCTGCGTTAG  | 104bp |
|              |                | ASTE016369              | Aste-nos                                                       | AGGATAGACCGAGACGCAAC<br>GTGGCAGAACACACAATGCT  | 136bp |
| ASTE003241   |                | Aste-vasa               | GAGCAAACCATCCATCAGGT<br>CTTCGTCTCCACAAACACCA                   | 105bp                                         |       |
| AGAP006098   |                | Agam-nos                | AGCGAACTGATGGAAGCTGT<br>TCCAGCTCGCAGGTACTTTT                   | 137bp                                         |       |
|              |                | Cas9                    | GATGAGCACCACCAGGATCT<br>ATCGATGTAACCGGCGTAAC                   | 117bp                                         |       |

**Table S2 – Reagents used for different experimental assays in the paper.**

|                 | <b>NAME IN ARTICLE</b>        | <b>SOURCE</b>            | <b>CAT # OR ID</b> |
|-----------------|-------------------------------|--------------------------|--------------------|
| <b>ANTIBODY</b> | sheep anti-digoxigenin (DIG)  | Roche                    | 11333089001        |
|                 | mouse anti-fluorescein (FITC) | Roche                    | 11426320001        |
|                 | donkey anti-sheep Alexa 488   | Thermo Fisher Scientific | A-11015            |
|                 | donkey anti-mouse Alexa 555   | Thermo Fisher Scientific | A-31570            |
| <b>KIT</b>      | RNeasy Mini                   | QIAGEN                   | 74104              |
|                 | TOPO TA Cloning               | Thermo Fisher Scientific | K450002            |
| <b>CHEMICAL</b> | Platinum Taq polymerase       | Invitrogen               | 15966005           |
|                 | T7 RNA polymerase             | Thermo Fisher Scientific | EP0111             |
|                 | SP6 RNA polymerase            | Thermo Fisher Scientific | EP0131             |
|                 | Ambion DNase I                | Invitrogen               | AM2224             |
|                 | Prolong Diamond Antifade      | Thermo Fisher Scientific | P36965             |
|                 | DIG RNA labeling mix          | Roche                    | 11277073910        |
|                 | Fluorescein RNA labeling mix  | Roche                    | 11685619910        |
|                 | Formamide                     | Sigma-Aldrich            | F9037              |
|                 | Pierce 16% Formaldehyde       | Thermo Fisher Scientific | 28906              |
|                 | iQ SYBR Green                 | Bio-Rad                  | 1708880            |
|                 | Salmon sperm DNA              | Thermo Fisher Scientific | 15632011           |
|                 | Ambion Yeast tRNA             | Invitrogen               | AM7119             |
|                 | RNAlater                      | Thermo Fisher Scientific | AM7021             |
